# Supplementary material
Source: PubMed Central journal article supplement (PMC8242886)
Supplement: RESP-26-707-s001.pdf [file RESP-26-707-s001.pdf]

# Delay or avoidance of medical care due to COVID-19 concerns in a region with low COVID-19 prevalence

Of 1260 surveyed adults in Victoria, Australia (Sept 2020), delay or avoidance was reported by:

**33%**

**Any care**

**26%**

**Routine care**

**10%**

**Urgent or emergency care**

**Any care avoidance was more common among...**

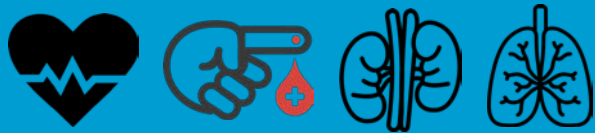

**People with chronic conditions**

aPR [95%CI] = 2.0 [1.6-2.5]

**People with disabilities**

aPR [95%CI] = 1.5 [1.2-1.8]

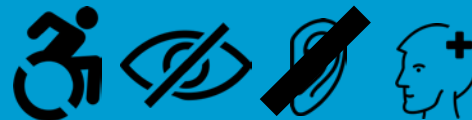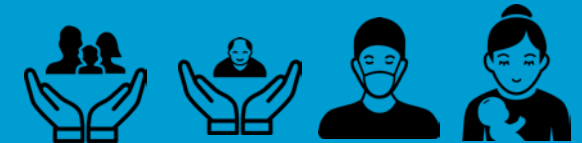

**Multigenerational unpaid caregivers**

aPR [95%CI] = 2.4 [2.0-3.0]

\*aPR = adjusted prevalence ratio
